# Supplementary material
Source: publisher site journal article supplement (https://www.dovepress.com/article/560098)
Supplement: Supplementary file 1 [file Supplementary%20Material.pdf]

**Supplementary Table 1. Distribution and performance of comorbidity scores when excluding malignant diagnoses from the comorbidity indices.**

| Comorbidity index                                           | Percentiles |      |      |      |      |      |      | C-statistic<br>(95% CI) |
|-------------------------------------------------------------|-------------|------|------|------|------|------|------|-------------------------|
|                                                             | 1st         | 10th | 25th | 50th | 75th | 90th | 99th |                         |
| <b>Basis models</b>                                         |             |      |      |      |      |      |      |                         |
| Model 1: Age, sex, year of diagnosis                        | -           | -    | -    | -    | -    | -    | -    | 0.64 (0.63-0.65)        |
| Model 2: As model 1 + marital status and area of residence  | -           | -    | -    | -    | -    | -    | -    | 0.65 (0.64-0.66)        |
| Model 3: As model 2 + tumour stage                          | -           | -    | -    | -    | -    | -    | -    | 0.82 (0.81-0.83)        |
| <b>Basis model 3 + Charlson comorbidity index score</b>     |             |      |      |      |      |      |      |                         |
| 1-year lookback                                             | 0           | 0    | 0    | 0    | 0    | 1    | 4    | 0.82 (0.81-0.83)        |
| 5-year lookback                                             | 0           | 0    | 0    | 0    | 1    | 2    | 5    | 0.82 (0.81-0.83)        |
| 10-year lookback                                            | 0           | 0    | 0    | 0    | 1    | 2    | 6    | 0.82 (0.81-0.83)        |
| <b>Basis model 3 + Elixhauser comorbidity index score</b>   |             |      |      |      |      |      |      |                         |
| 1-year lookback                                             | 0           | 0    | 0    | 0    | 1    | 2    | 4    | 0.82 (0.81-0.83)        |
| 5-year lookback                                             | 0           | 0    | 0    | 1    | 2    | 3    | 6    | 0.82 (0.81-0.83)        |
| 10-year lookback                                            | 0           | 0    | 0    | 1    | 2    | 3    | 7    | 0.82 (0.81-0.83)        |
| <b>Basis model 3 + Van Walraven comorbidity index score</b> |             |      |      |      |      |      |      |                         |
| 1-year lookback                                             | -3          | 0    | 0    | 0    | 0    | 5    | 14   | 0.82 (0.81-0.83)        |
| 5-year lookback                                             | -4          | 0    | 0    | 0    | 2    | 6    | 16   | 0.82 (0.81-0.83)        |
| 10-year lookback                                            | -4          | 0    | 0    | 0    | 3    | 7    | 17   | 0.82 (0.81-0.83)        |
| <b>Basis model 3 + Gagne score</b>                          | -1          | 0    | 0    | 0    | 0    | 1    | 3    | 0.82 (0.81-0.83)        |
| <b>Basis model 3 + Nordic multimorbidity score</b>          | -3          | 0    | 1    | 4    | 10   | 16   | 33   | 0.83 (0.82-0.84)        |

**Supplementary Table 2. Descriptive characteristics of 2,032 Danish patients operated for pancreatic adenocarcinoma during 2004-2022.**

|                                     | <b>N (%)</b>  |
|-------------------------------------|---------------|
| <b>Total</b>                        | 2,032         |
| <b>Age, median (IQR)</b>            | 69 (62-74)    |
| <b>Age group</b>                    |               |
| <60 years                           | 456 (22.4%)   |
| 61-70 years                         | 756 (37.2%)   |
| 71-80 years                         | 756 (37.2%)   |
| >80 years                           | 64 (3.1%)     |
| <b>Sex</b>                          |               |
| Men                                 | 1,098 (54.0%) |
| Women                               | 934 (46.0%)   |
| <b>Marital status</b>               |               |
| Married/registered partner          | 1,335 (65.7%) |
| Unmarried                           | 147 (7.2%)    |
| Divorced                            | 314 (15.5%)   |
| Widowed                             | 236 (11.6%)   |
| <b>Area of residence</b>            |               |
| Remote municipality                 | 200 (9.8%)    |
| Rural municipality                  | 559 (27.5%)   |
| Regional municipality               | 331 (16.3%)   |
| Urban/metropolitan municipality     | 942 (46.4%)   |
| <b>Calendar period of diagnosis</b> |               |
| 2004-2008                           | 204 (10.0%)   |
| 2009-2013                           | 438 (21.6%)   |
| 2014-2018                           | 696 (34.3%)   |
| 2019-2022                           | 694 (34.2%)   |
| <b>Tumor location</b>               |               |
| Head                                | 1,494 (73.5%) |
| Body                                | 131 (6.4%)    |
| Tail                                | 136 (6.7%)    |
| Other/multiple                      | 44 (2.2%)     |
| Unknown                             | 227 (11.2%)   |
| <b>AJCC stage</b>                   |               |
| Ia                                  | 108 (5.3%)    |
| Ib                                  | 211 (10.4%)   |
| IIa                                 | 294 (14.5%)   |
| IIb                                 | 1,310 (64.5%) |
| III                                 | 109 (5.4%)    |

**Supplementary Figure 1. Flowchart of the study population.**

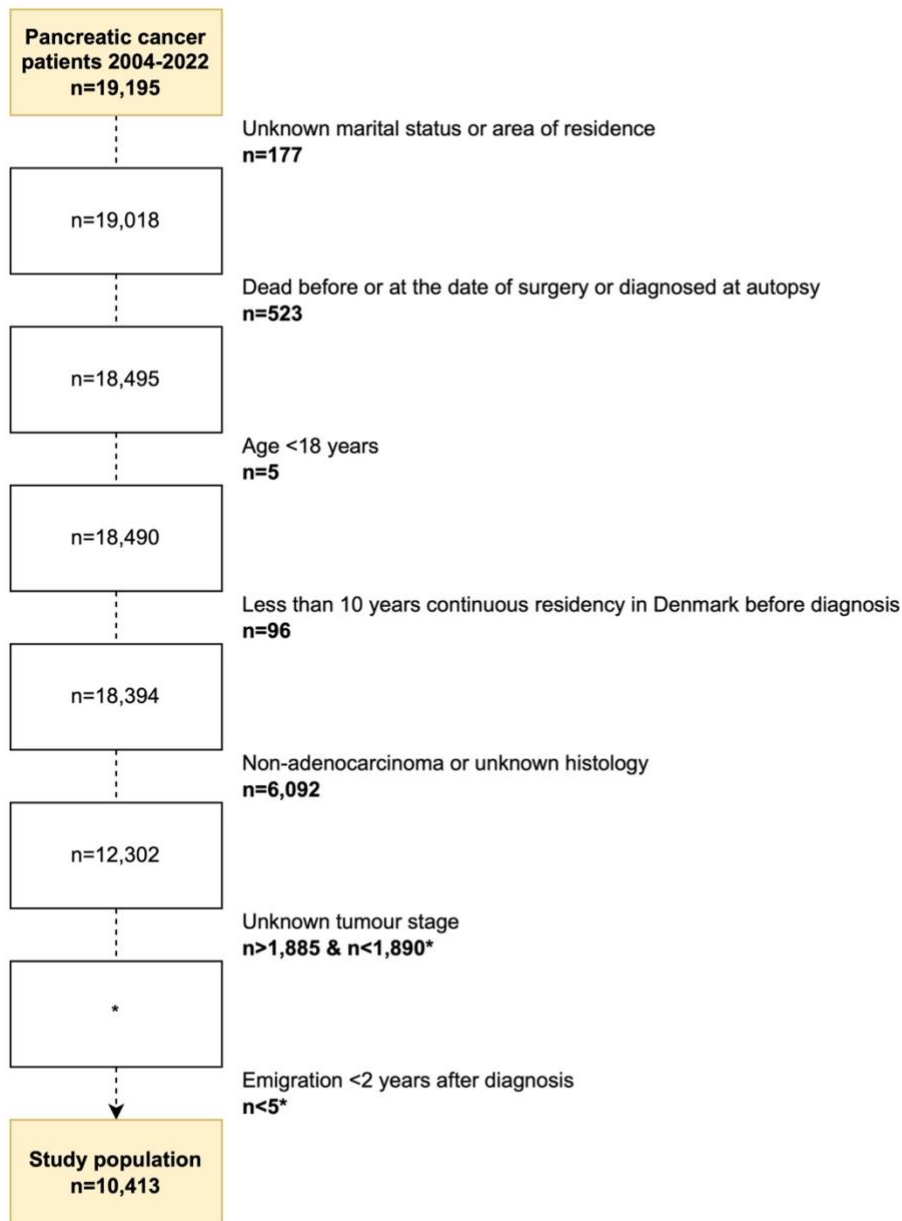

\* Numbers collapsed due to patient confidentiality

**Supplementary Table 3. Distribution and performance of comorbidity scores stratified by tumour stage (stage I).**

| Comorbidity index                                           | Percentiles |      |      |      |      |      |      | C-statistic<br>(95% CI) |
|-------------------------------------------------------------|-------------|------|------|------|------|------|------|-------------------------|
|                                                             | 1st         | 10th | 25th | 50th | 75th | 90th | 99th |                         |
| <b>Basis models</b>                                         |             |      |      |      |      |      |      |                         |
| Model 1: Age, sex, year of diagnosis                        | -           | -    | -    | -    | -    | -    | -    | 0.71 (0.66-0.76)        |
| Model 2: As model 1 + marital status and area of residence  | -           | -    | -    | -    | -    | -    | -    | 0.73 (0.68-0.76)        |
| <b>Basis model 2 + Charlson comorbidity index score</b>     |             |      |      |      |      |      |      |                         |
| 1-year lookback                                             | 0           | 0    | 0    | 0    | 1    | 2    | 9    | 0.74 (0.69-0.78)        |
| 5-year lookback                                             | 0           | 0    | 0    | 1    | 2    | 3    | 9    | 0.74 (0.69-0.79)        |
| 10-year lookback                                            | 0           | 0    | 0    | 1    | 2    | 4    | 10   | 0.74 (0.69-0.79)        |
| <b>Basis model 2 + Elixhauser comorbidity index score</b>   |             |      |      |      |      |      |      |                         |
| 1-year lookback                                             | 0           | 0    | 0    | 0    | 2    | 2    | 6    | 0.75 (0.70-0.79)        |
| 5-year lookback                                             | 0           | 0    | 0    | 1    | 2    | 3    | 7    | 0.74 (0.69-0.79)        |
| 10-year lookback                                            | 0           | 0    | 0    | 1    | 3    | 4    | 8    | 0.75 (0.70-0.79)        |
| <b>Basis model 2 + Van Walraven comorbidity index score</b> |             |      |      |      |      |      |      |                         |
| 1-year lookback                                             | -3          | 0    | 0    | 0    | 4    | 8    | 21   | 0.74 (0.69-0.78)        |
| 5-year lookback                                             | -4          | 0    | 0    | 0    | 5    | 11   | 21   | 0.74 (0.69-0.78)        |
| 10-year lookback                                            | -4          | 0    | 0    | 0    | 5    | 12   | 26   | 0.74 (0.69-0.78)        |
| <b>Basis model 2 + Gagne score</b>                          |             |      |      |      |      |      |      |                         |
| 1-year lookback                                             | -1          | 0    | 0    | 0    | 1    | 2    | 7    | 0.74 (0.70-0.81)        |
| <b>Basis model 2 + Nordic multimorbidity score</b>          |             |      |      |      |      |      |      |                         |
| 1-year lookback                                             | -4          | -1   | 0    | 4    | 11   | 22   | 51   | 0.76 (0.72-0.81)        |

**Supplementary Table 4. Distribution and performance of comorbidity scores stratified by tumour stage (stage II).**

| Comorbidity index                                           | Percentiles |      |      |      |      |      |      | C-statistic      |
|-------------------------------------------------------------|-------------|------|------|------|------|------|------|------------------|
|                                                             | 1st         | 10th | 25th | 50th | 75th | 90th | 99th | (95% CI)         |
| <b>Basis models</b>                                         |             |      |      |      |      |      |      |                  |
| Model 1: Age, sex, year of diagnosis                        | -           | -    | -    | -    | -    | -    | -    | 0.63 (0.61-0.66) |
| Model 2: As model 1 + marital status and area of residence  | -           | -    | -    | -    | -    | -    | -    | 0.64 (0.61-0.66) |
| <b>Basis model 2 + Charlson comorbidity index score</b>     |             |      |      |      |      |      |      |                  |
| 1-year lookback                                             | 0           | 0    | 0    | 0    | 1    | 2    | 6    | 0.65 (0.63-0.68) |
| 5-year lookback                                             | 0           | 0    | 0    | 0    | 1    | 3    | 8    | 0.65 (0.63-0.68) |
| 10-year lookback                                            | 0           | 0    | 0    | 0    | 2    | 3    | 9    | 0.65 (0.62-0.67) |
| <b>Basis model 2 + Elixhauser comorbidity index score</b>   |             |      |      |      |      |      |      |                  |
| 1-year lookback                                             | 0           | 0    | 0    | 0    | 1    | 2    | 5    | 0.65 (0.63-0.68) |
| 5-year lookback                                             | 0           | 0    | 0    | 1    | 2    | 3    | 6    | 0.65 (0.63-0.68) |
| 10-year lookback                                            | 0           | 0    | 0    | 1    | 2    | 4    | 7    | 0.65 (0.63-0.68) |
| <b>Basis model 2 + Van Walraven comorbidity index score</b> |             |      |      |      |      |      |      |                  |
| 1-year lookback                                             | -3          | 0    | 0    | 0    | 2    | 6    | 21   | 0.64 (0.62-0.67) |
| 5-year lookback                                             | -4          | 0    | 0    | 0    | 4    | 8    | 21   | 0.64 (0.62-0.67) |
| 10-year lookback                                            | -4          | 0    | 0    | 0    | 4    | 10   | 21   | 0.64 (0.62-0.67) |
| <b>Basis model 2 + Gagne score</b>                          | -1          | 0    | 0    | 0    | 0    | 1    | 5    | 0.64 (0.62-0.67) |
| <b>Basis model 2 + Nordic multimorbidity score</b>          | -3          | 0    | 0    | 3    | 8    | 16   | 39   | 0.66 (0.64-0.69) |

**Supplementary Table 5. Distribution and performance of comorbidity scores stratified by tumour stage (stage III).**

| Comorbidity index                                           | Percentiles |      |      |      |      |      |      | C-statistic      |
|-------------------------------------------------------------|-------------|------|------|------|------|------|------|------------------|
|                                                             | 1st         | 10th | 25th | 50th | 75th | 90th | 99th | (95% CI)         |
| <b>Basis models</b>                                         |             |      |      |      |      |      |      |                  |
| Model 1: Age, sex, year of diagnosis                        | -           | -    | -    | -    | -    | -    | -    | 0.64 (0.61-0.67) |
| Model 2: As model 1 + marital status and area of residence  | -           | -    | -    | -    | -    | -    | -    | 0.65 (0.62-0.69) |
| <b>Basis model 2 + Charlson comorbidity index score</b>     |             |      |      |      |      |      |      |                  |
| 1-year lookback                                             | 0           | 0    | 0    | 0    | 1    | 2    | 6    | 0.66 (0.62-0.69) |
| 5-year lookback                                             | 0           | 0    | 0    | 0    | 1    | 3    | 7    | 0.66 (0.63-0.69) |
| 10-year lookback                                            | 0           | 0    | 0    | 0    | 2    | 3    | 8    | 0.67 (0.64-0.70) |
| <b>Basis model 2 + Elixhauser comorbidity index score</b>   |             |      |      |      |      |      |      |                  |
| 1-year lookback                                             | 0           | 0    | 0    | 0    | 1    | 2    | 5    | 0.66 (0.63-0.69) |
| 5-year lookback                                             | 0           | 0    | 0    | 1    | 2    | 3    | 6    | 0.66 (0.63-0.69) |
| 10-year lookback                                            | 0           | 0    | 0    | 1    | 2    | 3    | 7    | 0.67 (0.64-0.70) |
| <b>Basis model 2 + Van Walraven comorbidity index score</b> |             |      |      |      |      |      |      |                  |
| 1-year lookback                                             | -2          | 0    | 0    | 0    | 0    | 6    | 21   | 0.65 (0.62-0.69) |
| 5-year lookback                                             | -4          | 0    | 0    | 0    | 4    | 7    | 21   | 0.66 (0.62-0.69) |
| 10-year lookback                                            | -4          | 0    | 0    | 0    | 5    | 10   | 23   | 0.66 (0.63-0.69) |
| <b>Basis model 2 + Gagne score</b>                          | -1          | 0    | 0    | 0    | 1    | 2    | 5    | 0.65 (0.62-0.69) |
| <b>Basis model 2 + Nordic multimorbidity score</b>          | -3          | 0    | 0    | 4    | 10   | 18   | 39   | 0.68 (0.65-0.71) |

**Supplementary Table 6. Distribution and performance of comorbidity scores stratified by tumour stage (stage IV).**

| Comorbidity index                                           | Percentiles |      |      |      |      |      |      | C-statistic      |
|-------------------------------------------------------------|-------------|------|------|------|------|------|------|------------------|
|                                                             | 1st         | 10th | 25th | 50th | 75th | 90th | 99th | (95% CI)         |
| <b>Basis models</b>                                         |             |      |      |      |      |      |      |                  |
| Model 1: Age, sex, year of diagnosis                        | -           | -    | -    | -    | -    | -    | -    | 0.66 (0.64-0.68) |
| Model 2: As model 1 + marital status and area of residence  | -           | -    | -    | -    | -    | -    | -    | 0.67 (0.65-0.69) |
| <b>Basis model 2 + Charlson comorbidity index score</b>     |             |      |      |      |      |      |      |                  |
| 1-year lookback                                             | 0           | 0    | 0    | 0    | 1    | 2    | 8    | 0.67 (0.65-0.69) |
| 5-year lookback                                             | 0           | 0    | 0    | 0    | 2    | 3    | 9    | 0.67 (0.65-0.69) |
| 10-year lookback                                            | 0           | 0    | 0    | 0    | 2    | 4    | 9    | 0.67 (0.65-0.69) |
| <b>Basis model 2 + Elixhauser comorbidity index score</b>   |             |      |      |      |      |      |      |                  |
| 1-year lookback                                             | 0           | 0    | 0    | 0    | 1    | 2    | 4    | 0.67 (0.66-0.69) |
| 5-year lookback                                             | 0           | 0    | 0    | 1    | 2    | 3    | 6    | 0.68 (0.66-0.69) |
| 10-year lookback                                            | 0           | 0    | 0    | 1    | 2    | 4    | 7    | 0.68 (0.66-0.69) |
| <b>Basis model 2 + Van Walraven comorbidity index score</b> |             |      |      |      |      |      |      |                  |
| 1-year lookback                                             | -2          | 0    | 0    | 0    | 3    | 8    | 21   | 0.68 (0.66-0.69) |
| 5-year lookback                                             | -4          | 0    | 0    | 0    | 4    | 11   | 23   | 0.67 (0.65-0.69) |
| 10-year lookback                                            | -4          | 0    | 0    | 0    | 5    | 12   | 25   | 0.67 (0.65-0.69) |
| <b>Basis model 2 + Gagne score</b>                          | -1          | 0    | 0    | 0    | 1    | 2    | 6    | 0.67 (0.66-0.69) |
| <b>Basis model 2 + Nordic multimorbidity score</b>          | -3          | 0    | 1    | 5    | 12   | 23   | 43   | 0.69 (0.66-0.69) |
